# Supplementary material
Source: PubMed Central journal article supplement (PMC9232980)
Supplement: NIHMS1791000-supplement-1.pdf [file NIHMS1791000-supplement-1.pdf]

**Supplementary Information for**

**Decoding naturalistic affective behavior from spectro-spatial features in multiday human iEEG**

Maryam Bijanzadeh<sup>1</sup>, Ankit N. Khambhati<sup>1</sup>, Maansi Desai<sup>2</sup>, Deanna L. Wallace<sup>3</sup>, Alia Shafi, Heather E. Dawes<sup>1</sup>, Virginia E. Sturm<sup>4</sup>, and Edward F. Chang<sup>1\*</sup>

<sup>1</sup> Department of Neurological Surgery, University of California, San Francisco, USA

<sup>2</sup> Department of Communication Sciences and Disorders, Moody College of Communication, University of Texas at Austin, Austin, TX, USA

<sup>3</sup> Departments of Mechanical Engineering, Psychology and Neurology, University of Texas at Austin, Austin, TX, USA

<sup>4</sup> Department of Neurology, UCSF Weill Institute for Neurosciences, University of California San Francisco, San Francisco, CA, USA

\* Corresponding author name: Edward F. Chang

**Email:** [Edward.Chang@ucsf.edu](mailto:Edward.Chang@ucsf.edu)

## Supplementary Information

### Supplementary Results

#### Behavioral Annotations

Participants exhibited a wide range of positive (range: 42-164), negative (range: 34-133), and neutral (range: 277-499, Table S4, for example see Subject 3) behaviors that aligned with clean neural signals that were free from epileptic activity (Extended Data Figure 2). Overall, our dataset included more instances of positive (mean  $\pm$  sem =  $112 \pm 17$ ,  $n = 10$  participants) than negative (mean  $\pm$  sem =  $61 \pm 19$ ,  $n = 5$  subjects) affective behavior. While smiling and laughing occurred frequently, pain-discomfort and negative verbalizations were less common (Extended Data Figure 1).

#### Clustering Analyses

We conducted hierarchical clustering in each participant (See “Clustering” in Methods and Supplementary Figure 8), an objective way to map the features that characterized the positive and negative affective behaviors from each decoder. While we observed common changes in spectral power across mesolimbic regions during positive and negative affective behaviors, clustering the features allowed us to control for possible collinearity between features (e.g., increased high gamma activity in multiple brain structures during positive affective behaviors might have driven our previous results, Figure 3-A). This clustering analysis identified two clusters—a “gamma” cluster and a “low-frequency” cluster (Extended Data Figure 5)—from the positive and negative decoders that separated affective from neutral behaviors based on spectral bands rather than regions (Supplementary Figure 8). These results suggested that, at an individual level, simultaneous increases in gamma activity and decreases in low-frequency activity across the mesolimbic network characterized both positive and negative affective behaviors when compared to neutral behaviors. In general, affective behaviors were separated from neutral behaviors along a spectral rather than spatial distribution (in which specific regions, not frequency bands, had predominant roles in certain behaviors). There were some exceptions to this pattern, however, in individual participants (Participant 5, Supplementary Figure 9).

We next investigated whether the spectral patterns that we observed for affective behaviors at the individual level (Supplementary Figures 9 & 10) were found across the sample, regardless of each participant’s spatial coverage. Proceeding to extraction of the difference scores using the feature medians in each affective class and populating these scores across participants (See Methods “Feature Normalization for group level analyses” & “Clustering” & Supplementary Figure 11), we found that consistent with the results from the clustering analyses conducted at the individual level, positive affective behaviors were characterized by higher median values in the gamma cluster (Figure 3-E) and lower median values in the low frequency cluster (median of gamma cluster = 1.12 vs. low frequency cluster = -1.43, ranksum test,  $p < 0.0001$ ) than neutral behaviors. A similar pattern was found for negative affective behaviors when they were compared to neutral behaviors (Figure 3-F, median of gamma cluster = 0.68 vs. low frequency cluster = -0.92, ranksum test,  $p < 0.0001$ ). In sum, simultaneous increases in high frequency activity and decreases in low frequency activity within the mesolimbic network may be a common network signature of both positive and negative affective behaviors.

#### Feature importance from binary decoders

To determine which of the selected features played a dominant role in the decoder models of each participant, we pooled the feature importance, which was generated by the RF models, for the gamma and low-frequency clusters from both the positive and negative decoders (Extended Data Figure 5-C & D). Although at the population level, the selected spectro-spatial features in all frequency bands (except alpha) were significantly different between positive affective behaviors and neutral behaviors (Figure 3-C), the gamma cluster ( $n=149$ , median = 0.36) was significantly more important than low-frequency cluster ( $n = 124$ , median = 0.29) for the positive decoder models (i.e., larger feature importance value, ranksum test,  $p = 0.0017$ , Extended Data Figure 5-C left). In distinguishing negative affective behaviors from the neutral behaviors, high gamma band, alpha and beta bands activity were significantly different between the two behaviors (Figure 3-D). In line with this observation, both the gamma ( $n = 62$ , median = 0.43) and low-frequency ( $n = 45$ , median = 0.38) clusters were equally important for the negative decoder’s successful decoding (ranksum test,  $p = 0.16$ , Extended Data Figure 5-D left). These findings suggest negative affective behaviors may be more heterogenous than positive affective behaviors and may rely on both types of spectral signatures to distinguish them from moments lacking affect.

## Stability of features from binary decoders

To assess the robustness of the important features being selected with a likelihood better than chance, we counted the number of times each feature was selected across 100 bootstrapped runs of each RF model for each participant. We refer to the proportion of runs in which the features were selected in the positive and negative decoders as the “feature stability” (Extended Data Figure 5-C&D, right panels). We found that features within the gamma cluster of the positive decoder were more stable than features within the low-frequency cluster (87% of runs vs 80% of runs,  $p = 0.0015$ , ranksum test). We also observed greater stability of features within the gamma cluster compared to the low-frequency cluster for the negative decoder (median value of 79% of runs vs 68% of runs,  $p = 0.003$ , ranksum test). Also, as expected, stability and feature importance were significantly correlated across all features ( $r = 0.65$ ,  $p < 0.0001$ ,  $n = 273$ ; and  $r = 0.82$ ,  $p < 0.0001$ ,  $n = 107$ , for positive and negative vs. affectless decoders, respectively, spearman correlation). This confirms that more important features were also more reliable features for decoding.

## Differences between the positive and negative decoders

To assess whether the differences between the features that contributed to the positive and negative decoders were due to the feature selection method (i.e., the kneedle algorithm), we also compared the top 10 features from each decoder type regardless of the objective threshold (Supplementary Tables 5 and 6); the negative decoders were more likely to consist of features from the low-frequency cluster than the positive decoders (i.e., Subject1: 3/10 vs. 1/10, Subject 2: 6/10 vs. 4/10, and Subject 3: 7/10 vs. 0/10). Meanwhile, Subject 6 demonstrated a greater likelihood for important low-frequency features for the positive decoder (3/10) than the negative decoder (2/10). This finding was consistent with the objective feature comparison method used in our primary analyses (Extended Data Figure 5-C&D), which showed no significant difference in feature importance of the selected features between low-frequency and gamma clusters for the negative decoder but greater feature important for the gamma cluster than the low-frequency cluster for the positive decoder. For example, the selected and clustered features for Subject 1 (Supplementary Figure 6-A & B) show more low-frequency features selected for the negative decoders than the positive decoders. Thus, these findings are robust to the methods that were used.

## Additional tests for the feature selection

We applied other techniques to certify the robustness of the selected features. We extracted the  $t$ -statistics of the feature distributions between the behavioral classes for two participants and sorted the features (Supplementary Figure. 4). The results showed that the top 10 features with  $t$ -scores larger than the critical  $t$ -score were also selected features by the RF models. Moreover, we trained personalized linear support vector machine (SVM) models and sorted the features based on the absolute value of the feature weights (See Methods, “SVM Model Classification: Linear SVM”, Supplementary Figures 5 & 6) for both the positive and negative decoders. The results uncovered similarities between the selected features of the linear SVM and RF models, but the RF models performed better in 7/10 and 4/5 participants. We also trained nonlinear SVM classifiers (with rbf kernel) using the selected feature sets that were derived from the RF models (See Methods, “SVM Model Classification: Non-linear SVM”). The resulting non-linear SVM models showed a similar performance as the RF models (Supplementary Figure 7), which further confirmed the robustness of the feature selection method.

## Regional variability and feature importance from multiclass decoders

We examined whether regional variability existed across the channels in the participants in whom the multiclass decoder was applied. These analyses enabled us to investigate whether certain regions made more important contributions to positive or negative affective behaviors than others. In each participant, we visualized the median distribution of spectral power during each type of affective behavior (Supplementary Figure 14). These graphs suggested that high gamma power discriminated positive and negative affective behaviors from neutral behavior in 2/3 participants (Subjects 1 and 6) and generally showed a similar stratification as in Figure 6B (positive, then negative, then neutral). In 1/3 participants (Subject 2), however, there were clear divisions but in a different order (negative, then positive, then neutral), The graphs also indicated that, although a given subregion within the insula could exhibit stronger high-gamma activation during negative than positive affective behaviors (INS1 and INS3 in Subject 2 and INS5 in Subject 6), other subregions may be more tuned to positive affective behaviors (INS1 in Subject 1 and INS3 in Subject 6). Although high-gamma band activity had a significantly larger feature importance than the theta, alpha, and beta bands together (Supplementary Figure 15), we did not observe a significant difference between these spectral bands across different regions. Thus, different electrodes within same brain region may have made different contributions to the decoding performance and may have played distinct functional role in the neural representation of affective behaviors.

**Supplementary Figure 1.** Sample distribution of selected features for example participant (Subject 1) that contributed to negative decoders.

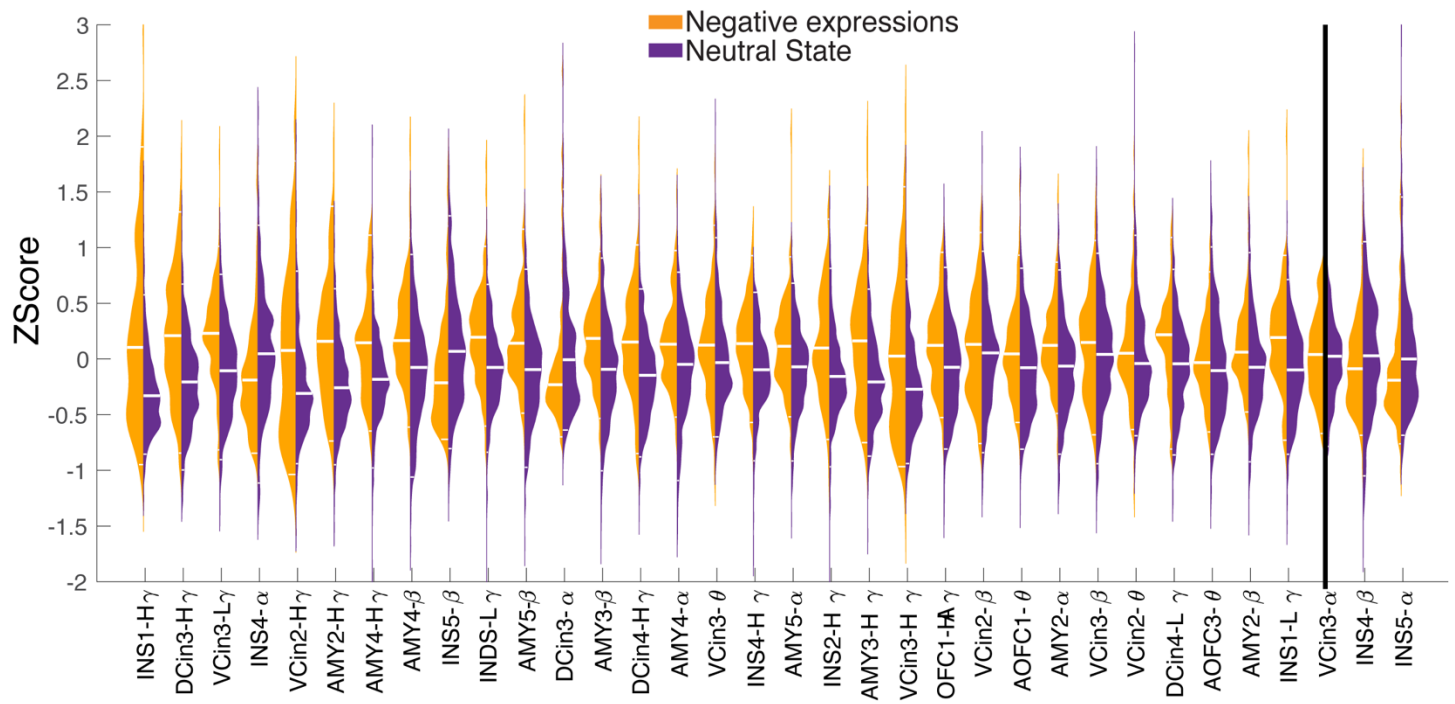

**Supplementary Figure 2.** Selected features from the RF models that were trained on positive affective behaviors and neutral behaviors (gray shading). The feature importance of the selected features from the shuffled models are shown in yellow. Bar charts represent mean values +/- SEM across 100 datasets of the selected features. INS: insula, VCin = Ventral cingulate, DCin = dorsal cingulate, AMY: amygdala, OFC = Orbitofrontal cortex. All statistics are reported by two-sided pairwise ranksum test between 100 runs of RF models and the shuffled models for each feature. All statistics are reported by two-sided pairwise ranksum test between n= 100 runs of RF models and the shuffled models for each feature. All p values are less than 0.0005 except the two those that are noted in the figure. the comparison is between feature importance of main models and permuted models in which the labels are shuffled, thus the significance level = 0.0005 (refer to the Methods section “Statistical Analyses”).

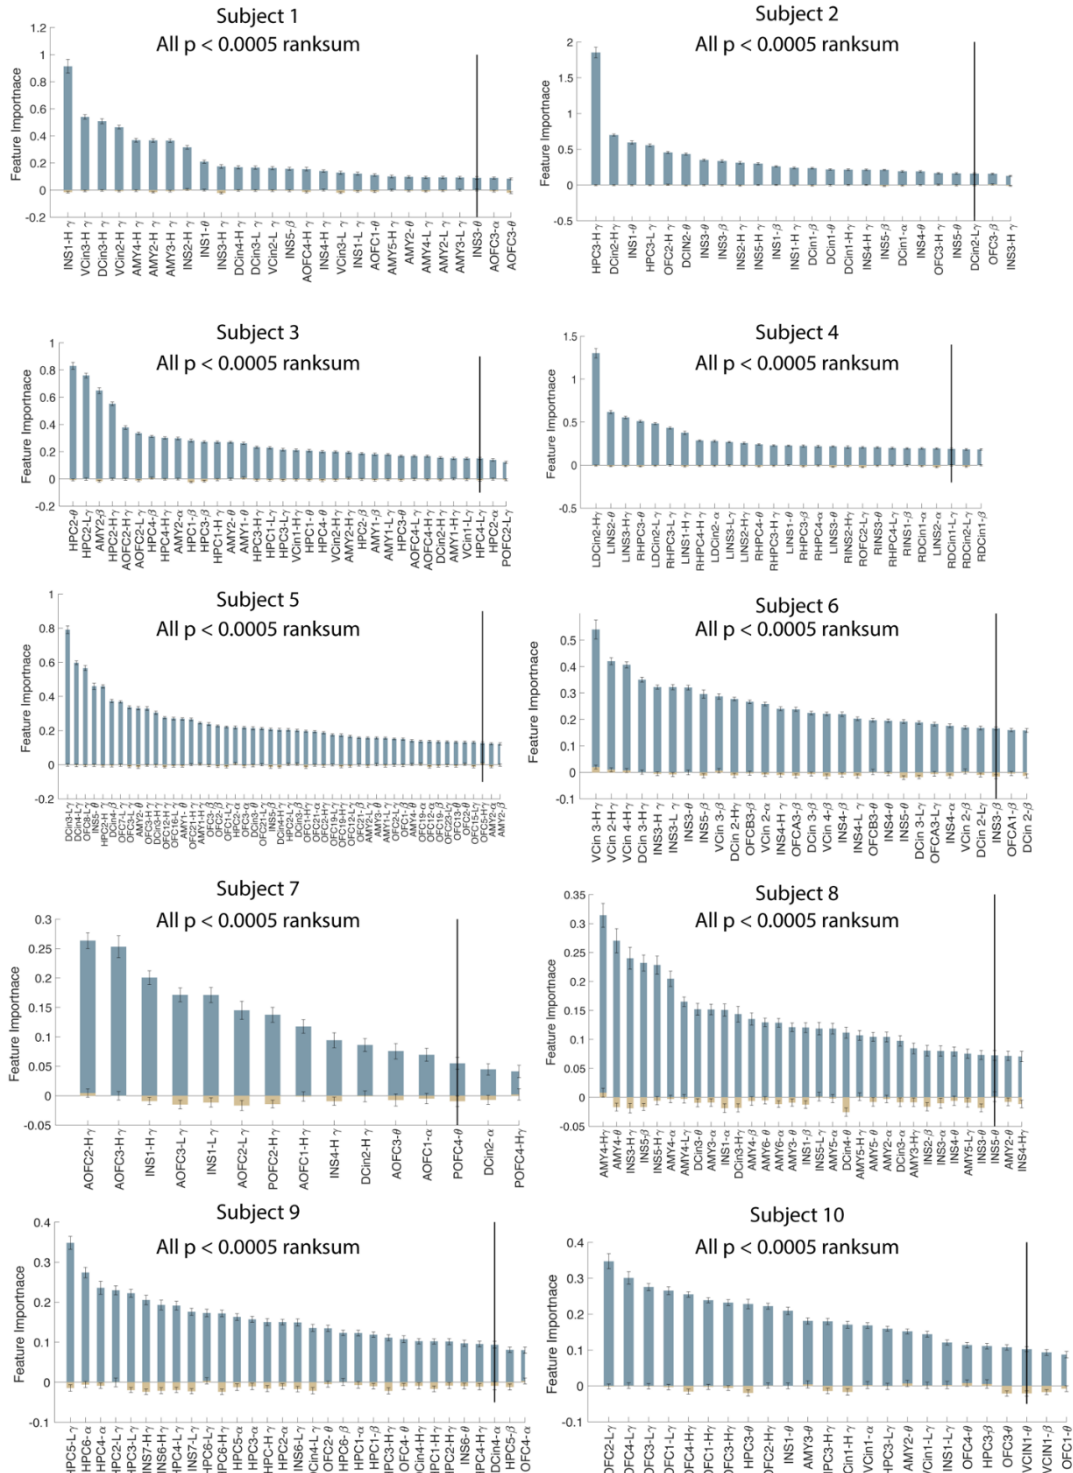

**Supplementary Figure 3.** Selected features from the RF models that were trained on negative affective behaviors and neutral behaviors (gray shading). The feature importance of the selected features from the shuffled models are shown in yellow. Bar charts represent mean values +/- SEM across 100 datasets of the selected features. INS: insula, VCin = Ventral cingulate, DCin = dorsal cingulate, AMY: amygdala, OFC = Orbitofrontal cortex. All statistics are reported by two-sided pairwise ranksum test between n= 100 runs of RF models and the shuffled models for each feature. All p values are less than 0.0005 except the two those that are noted in the figure. the comparison is between feature importance of main models and permuted models in which the labels are shuffled, thus the significance level = 0.0005. (refer to the Methods section "Statistical Analyses").

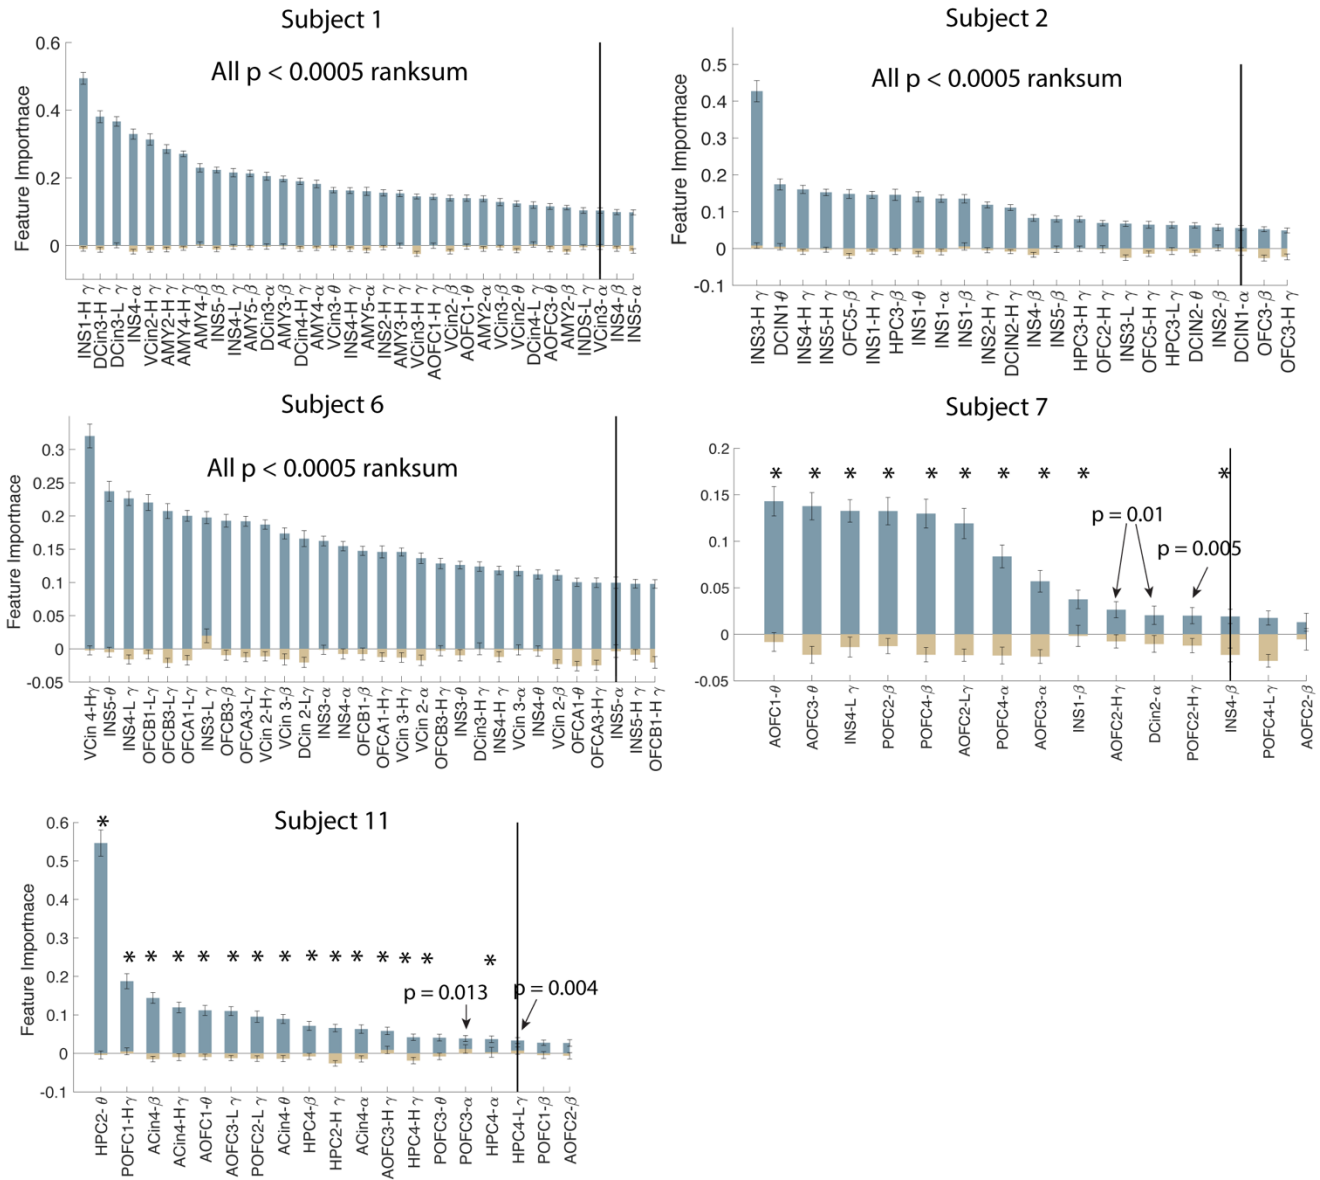

**Supplementary Figure 4.** Comparison of selected features by sorted *t*-statistics (left) and random forest prediction error (right) for two participants.

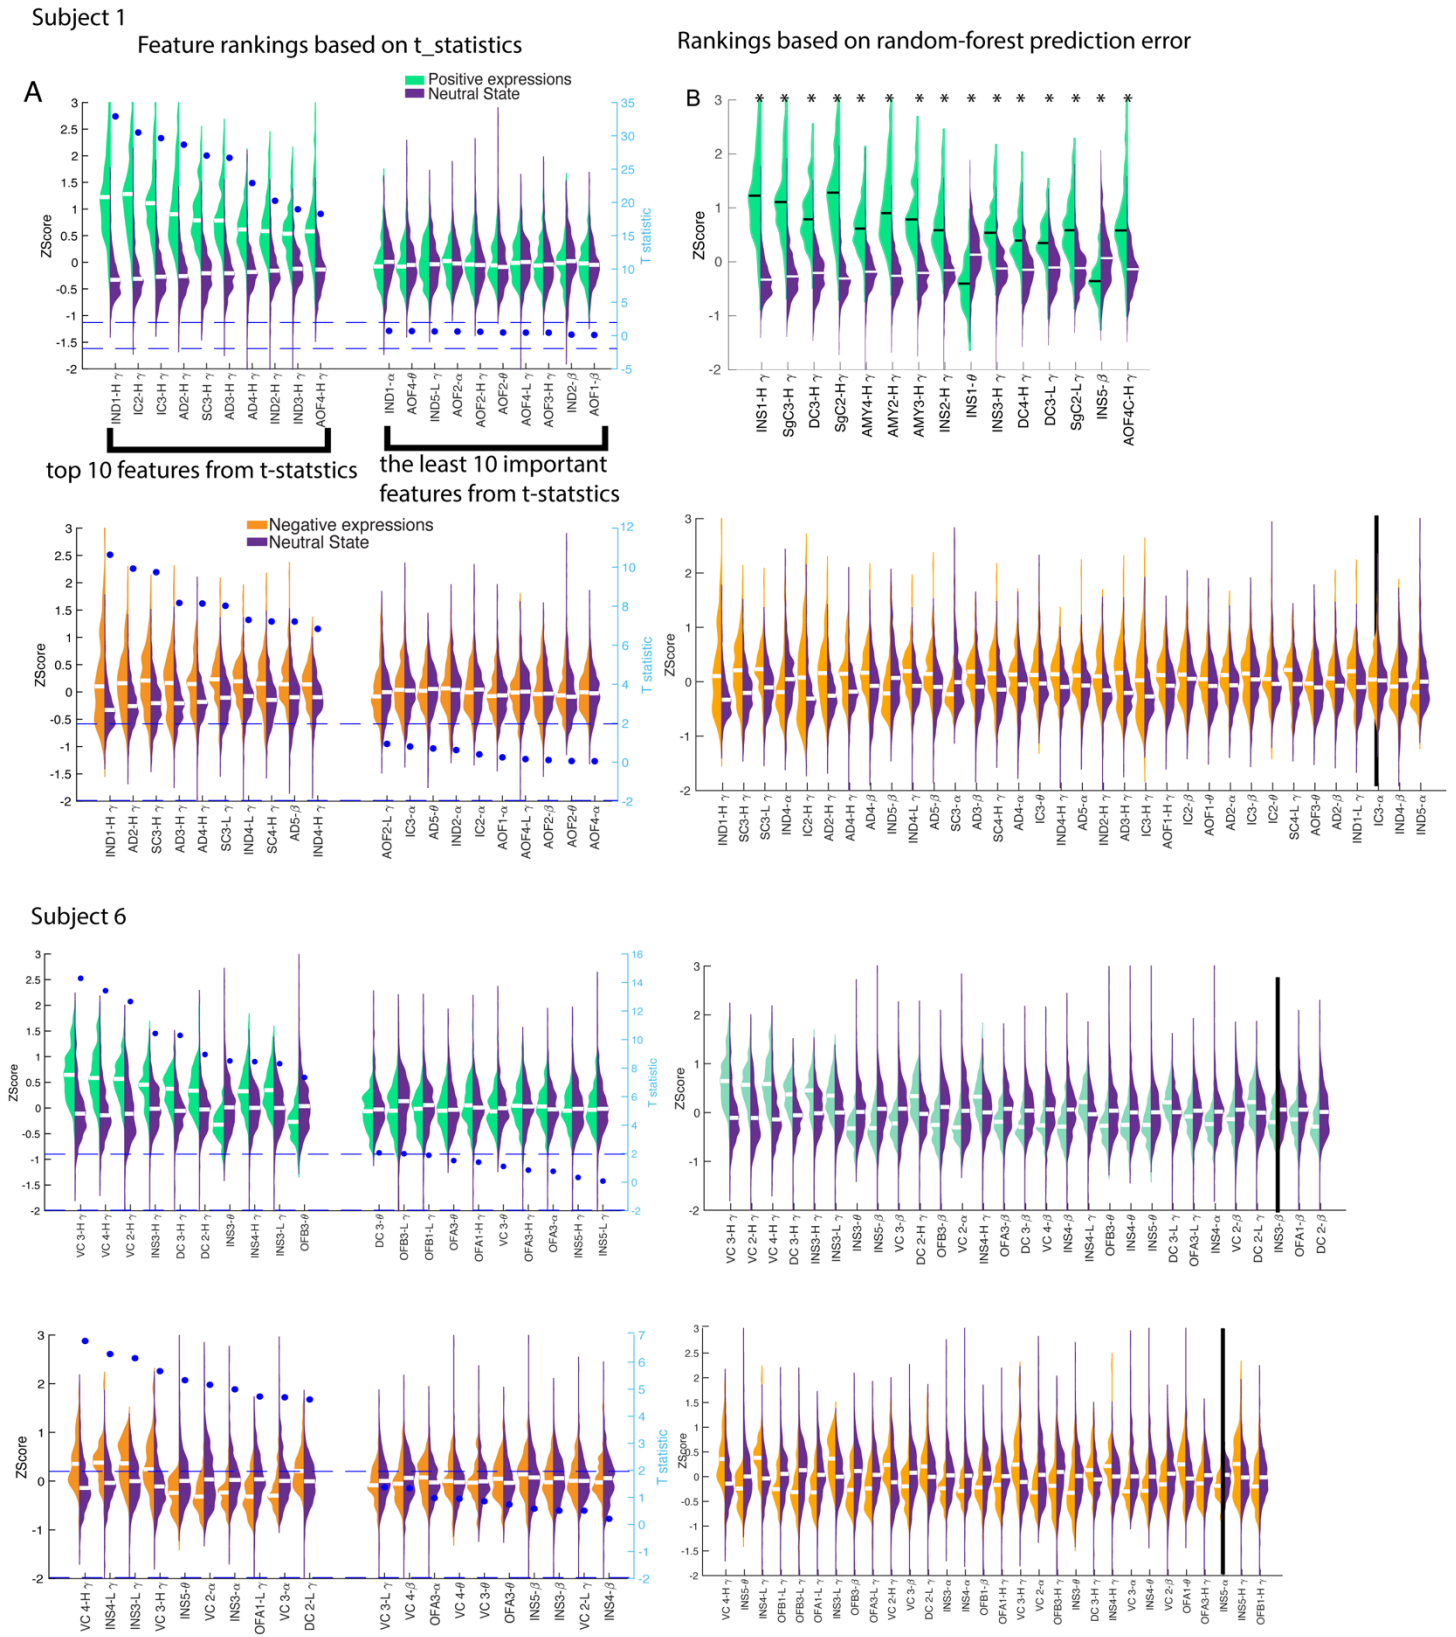

**Supplementary Figure 5.** Linear SVM classifiers were trained on the positive affective behaviors and neutral behaviors. The decoder performance, as well as the top 15 features, are contrasted with the RF models. Box plots represent distribution of accuracy for both models across n=100 datasets. Central lines represent the median and the two edges represent 25 and 75 percentiles, whiskers show the most extreme datapoints and outliers are shown individually (see MATLAB boxplot function). Bar charts represent mean values +/- SEM across 100 datasets of the 15 features for both RF (middle panels) and SVM(Right) models. The similarity index (SI) of the selected features from the two models is also stated in each panel. INS: insula, VCin = Ventral cingulate, DCin = dorsal cingulate, AMY: amygdala, OFC = Orbitofrontal cortex. \*\*\* signifies  $p < 0.0001$ , \*\* signifies  $p < 0.01$  and \* signifies  $p < 0.05$ .

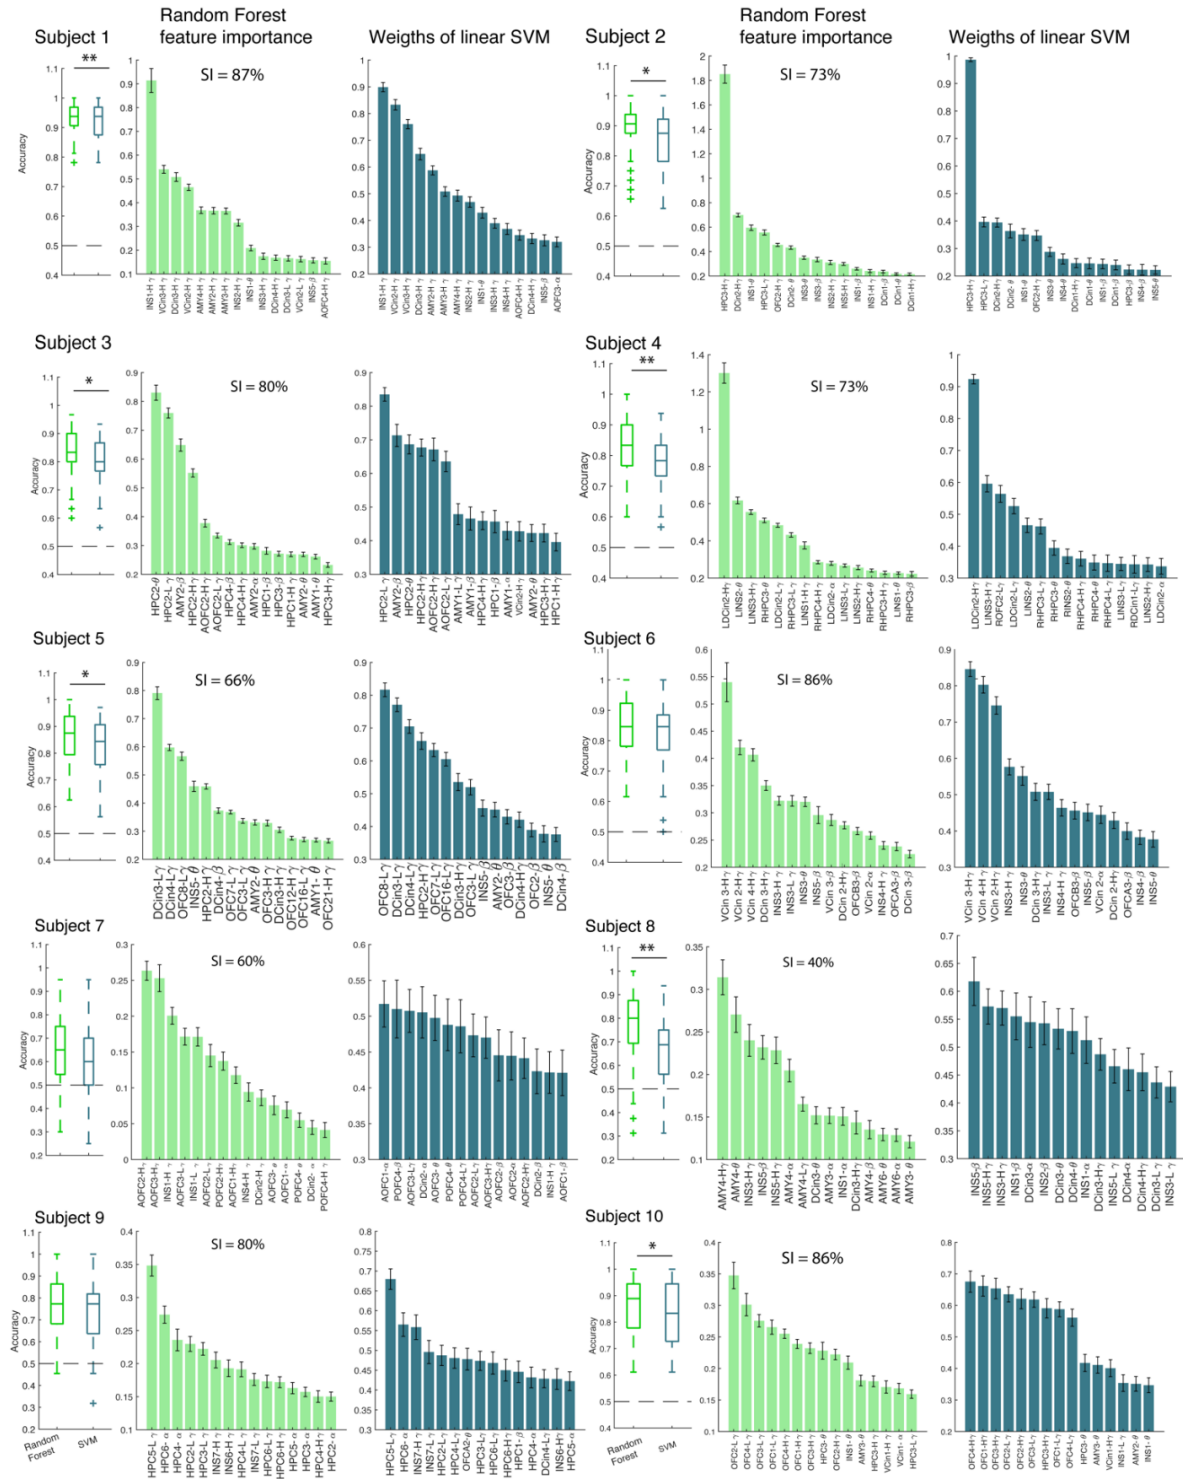



**Supplementary Figure 6.** Linear SVM classifiers were trained on the negative affective behaviors and neutral behaviors. The decoder performance, as well as the top 15 features, are contrasted with the RF models. Box plots represent distribution of accuracy for both models across n=100 datasets(i.e. runs). Central lines represent the median and the two edges represent 25 and 75 percentiles, whiskers show the most extreme datapoints and outliers are shown individually (see MATLAB boxplot function). Bar charts represent mean values +/- SEM across 100 datasets of the 15 features for both RF(middle panels) and SVM(Right) models. The similarity index (SI) of the selected features from the two models is also stated in each panel. INS: insula, VCin = Ventral cingulate, DCin = dorsal cingulate, AMY: amygdala, OFC = Orbitofrontal cortex. \*\* signifies  $p < 0.01$  and \* signifies  $p < 0.05$

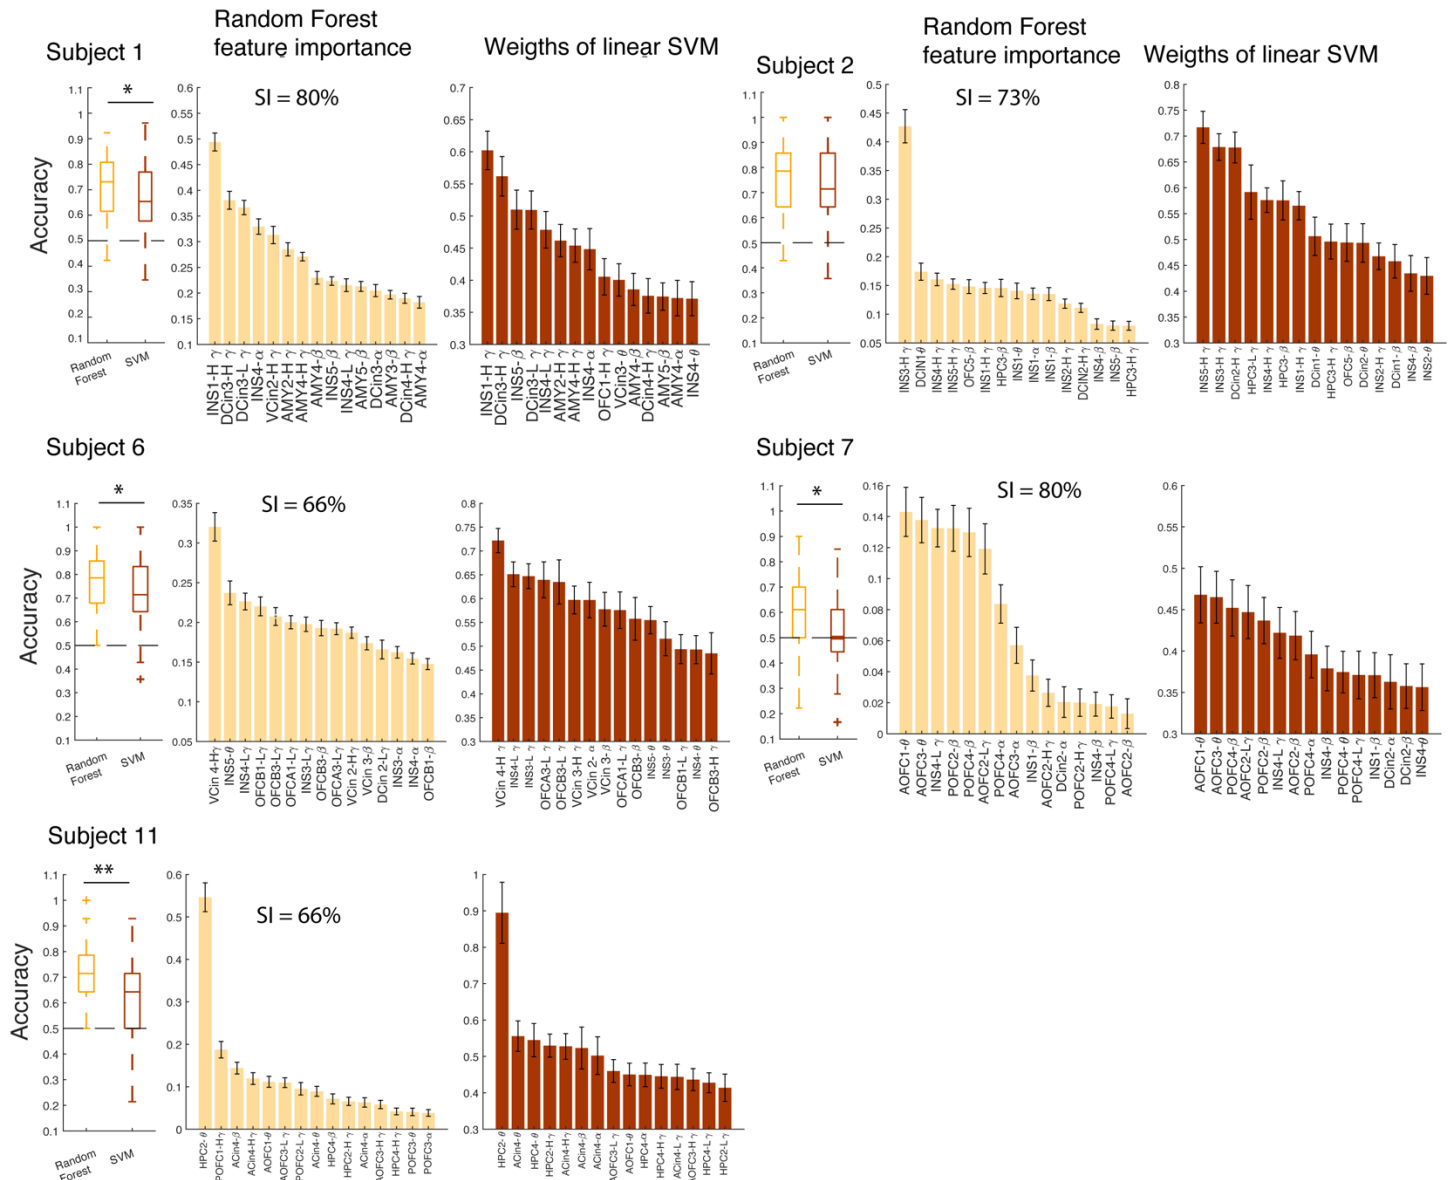

**Supplementary Figure 7.** Comparison of the RF and nonlinear SVM models across  $n=100$  datasets. The SVM models were trained using the selected features from the RF models. The RF and SVM models had a similar accuracy, which indicates that the selected features were robustly identified. In the box plots central lines represent the median and the two edges represent 25 and 75 percentiles, whiskers show the most extreme datapoints and outliers are shown individually (see MATLAB boxplot function).

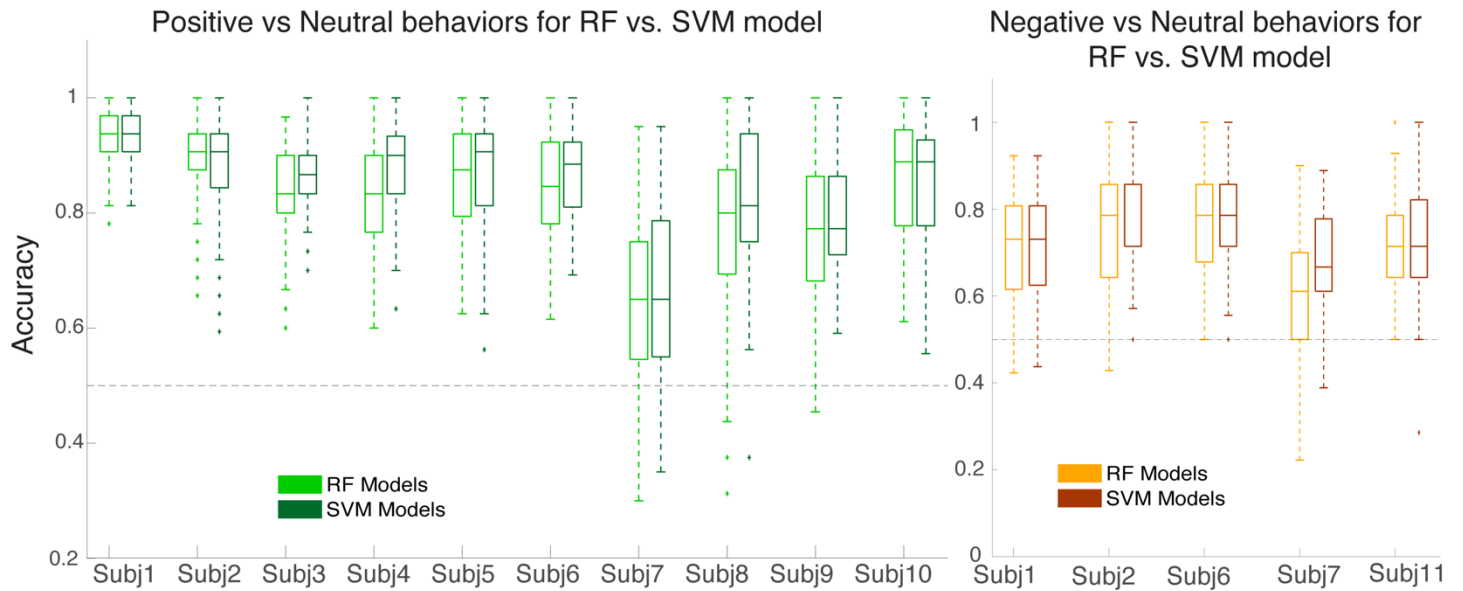

**Supplementary Figure 8.** Clustering results from an example participant. left: Correlation matrix across samples for the selected features, middle: dendrogram results from hierarchical clustering, right: similar correlation matrix as in the left but reordered based on the dendrogram. Example results for Subject 1 from the A) positive decoder and B) negative decoder.

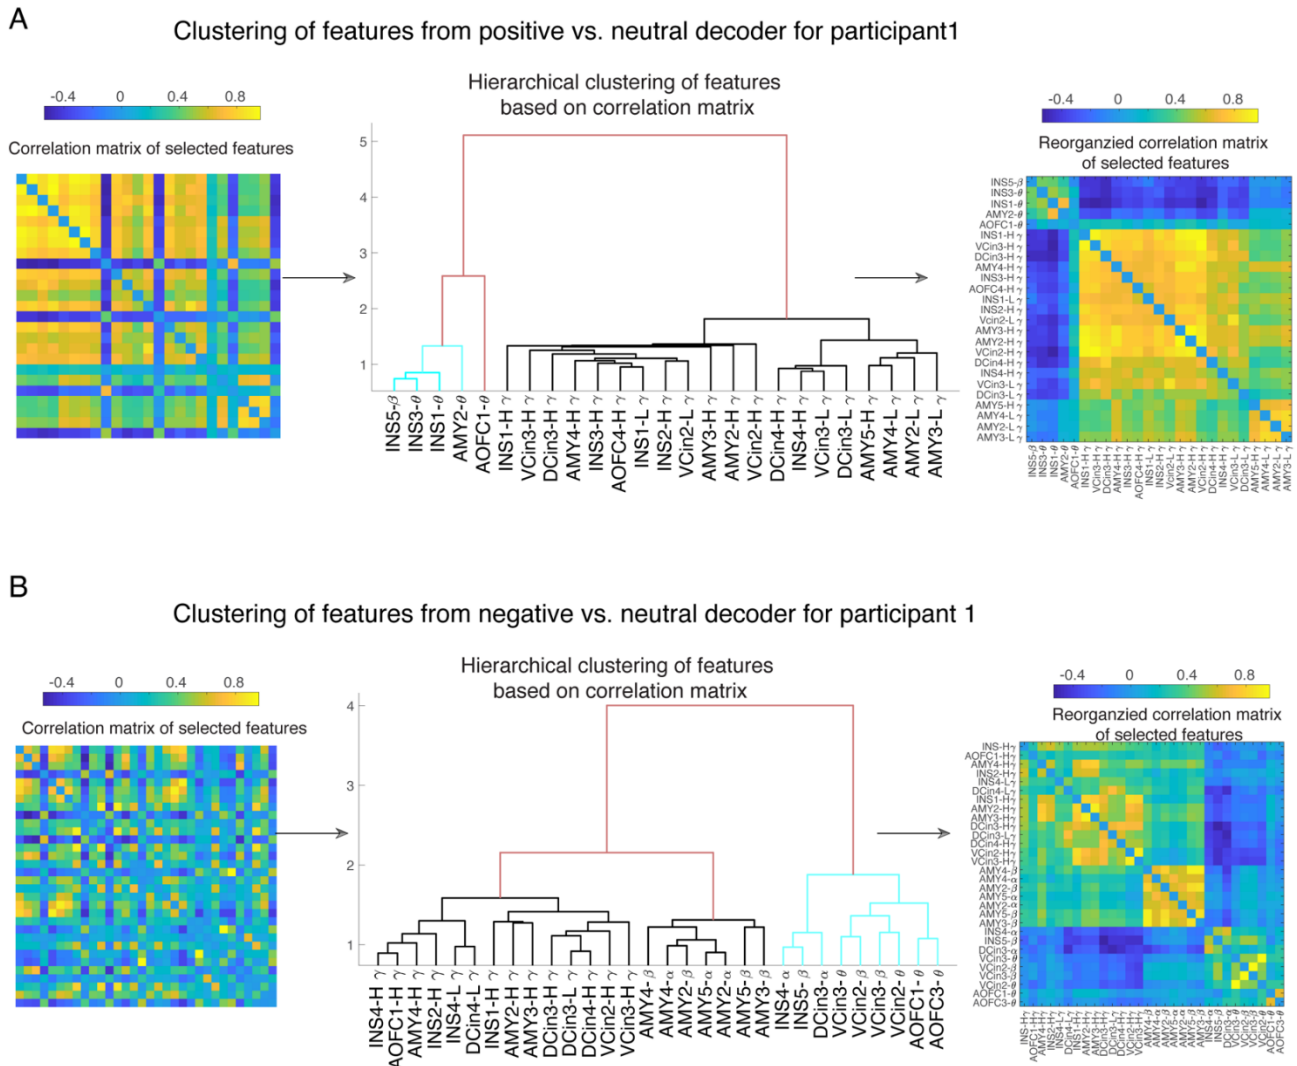

**Supplementary Figure 9.** *Personalized neural features from the positive decoders in 10 participants.* The values, that are illustrated on MNI brain template (Methods, section “Electrode localization”), are the median difference (positive affective behavior distribution minus neutral behavior distribution) scaled by the feature importance (a positive value) of the selected features that comprised the low-frequency (top row) and gamma (bottom row) clusters. Color maps show the strength of the median difference by feature importance for both the low-frequency and gamma clusters in each participant. The black dots represent the electrodes that were not main contributors to the decoders (i.e., they were included as an input to the decoder models but were not selected by the objective threshold).

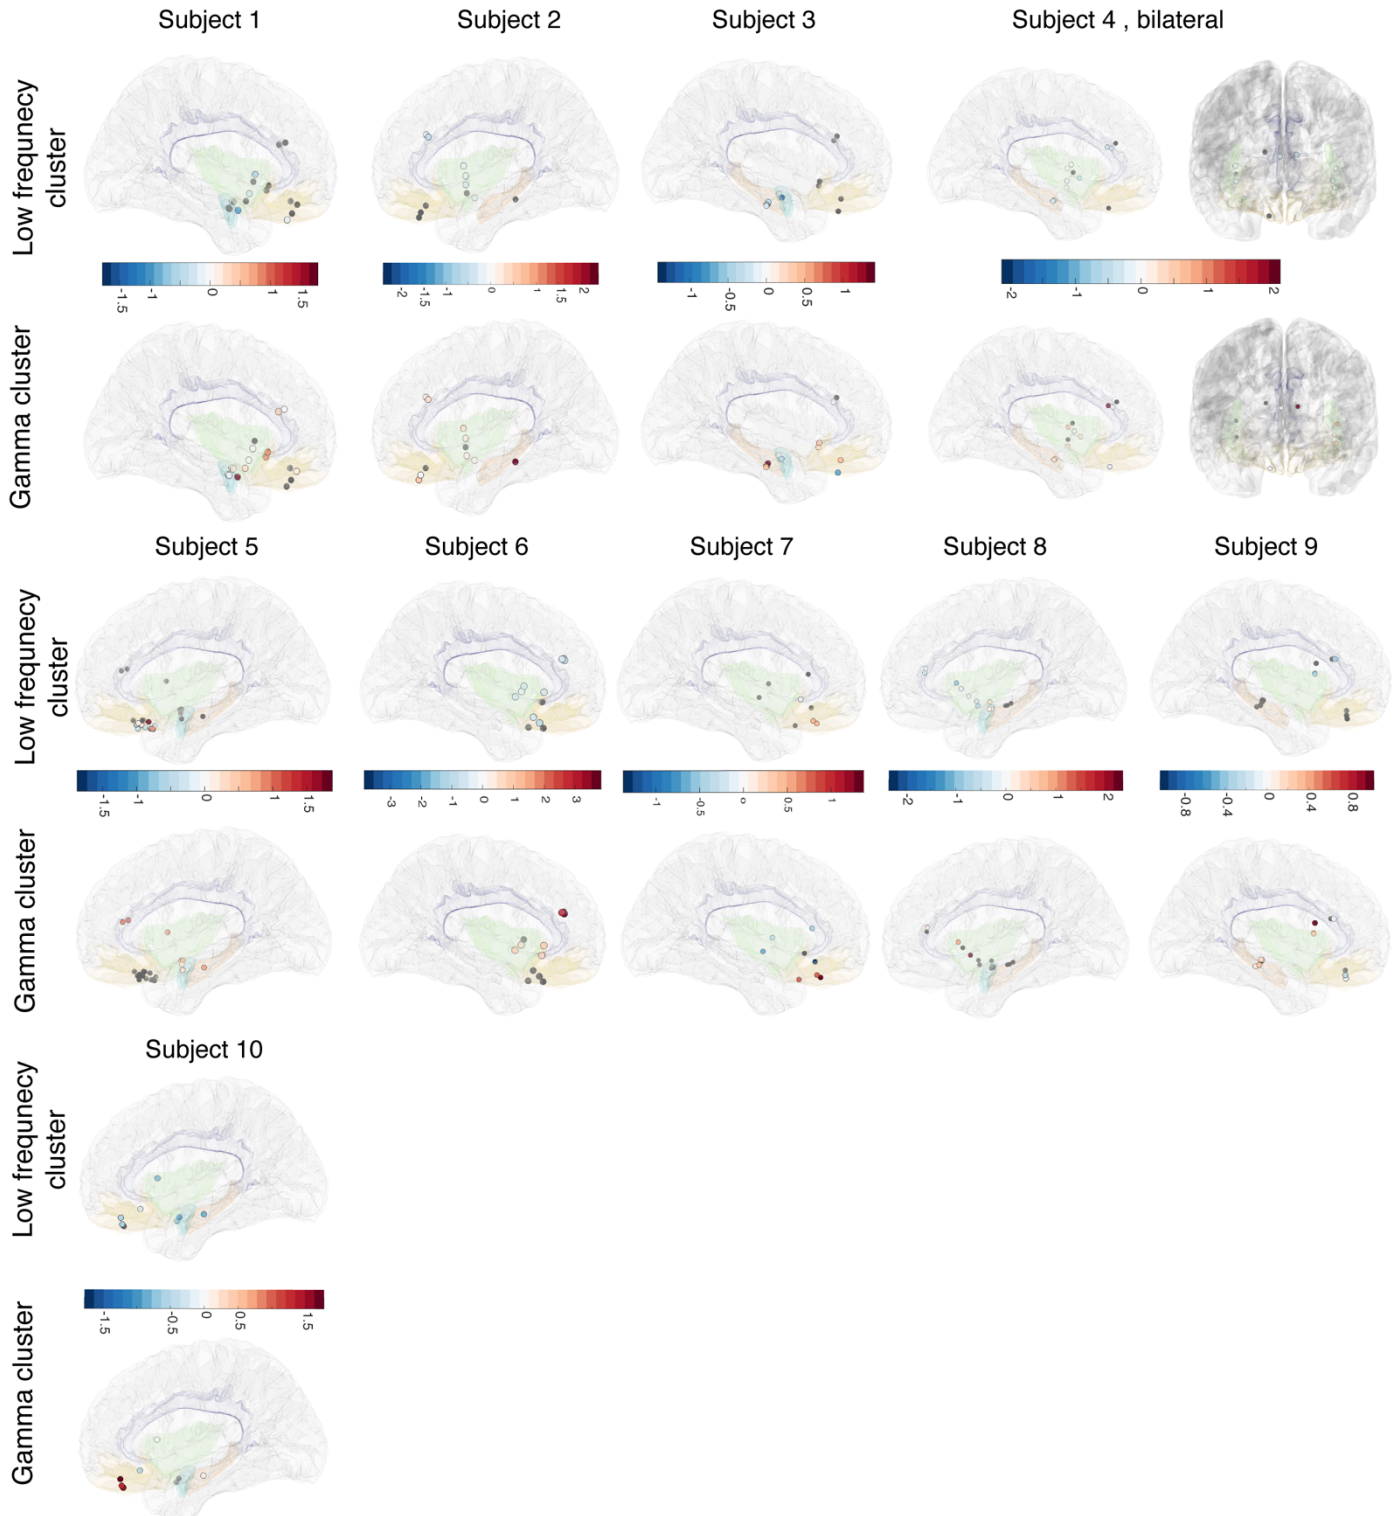

**Supplementary Figure 10.** *Personalized neural features from the negative decoders in 5 participants.* The values, that are illustrated on MNI brain template (Methods, section “Electrode localization”), are the median difference (negative affective behavior distribution minus neutral behavior distribution) scaled by the feature importance (a positive value) of the selected features that comprised the low-frequency (top row) and gamma (bottom row) clusters. Color maps show the strength of the median difference by feature importance for both the low-frequency and gamma clusters in each participant. The black dots represent the electrodes that were not main contributors to the decoders (i.e., they were included as an input to the decoder models but were not selected by the objective threshold).

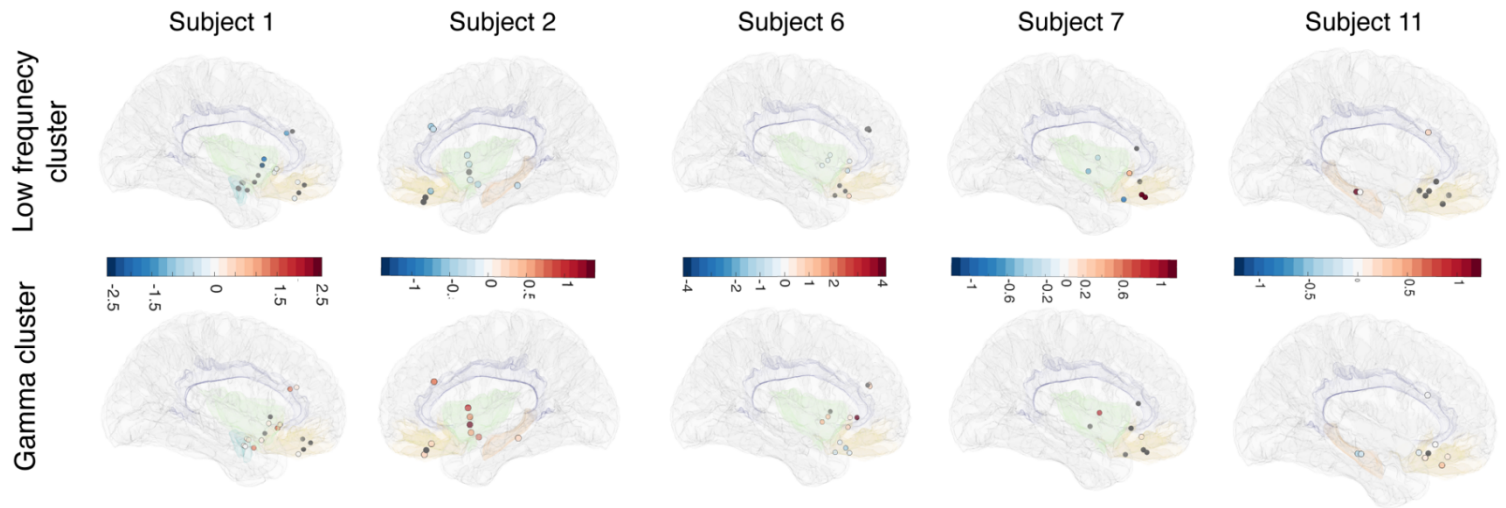

Supplementary Figure 11. Clustering and normalization pipeline.

within each subject for each decoder type

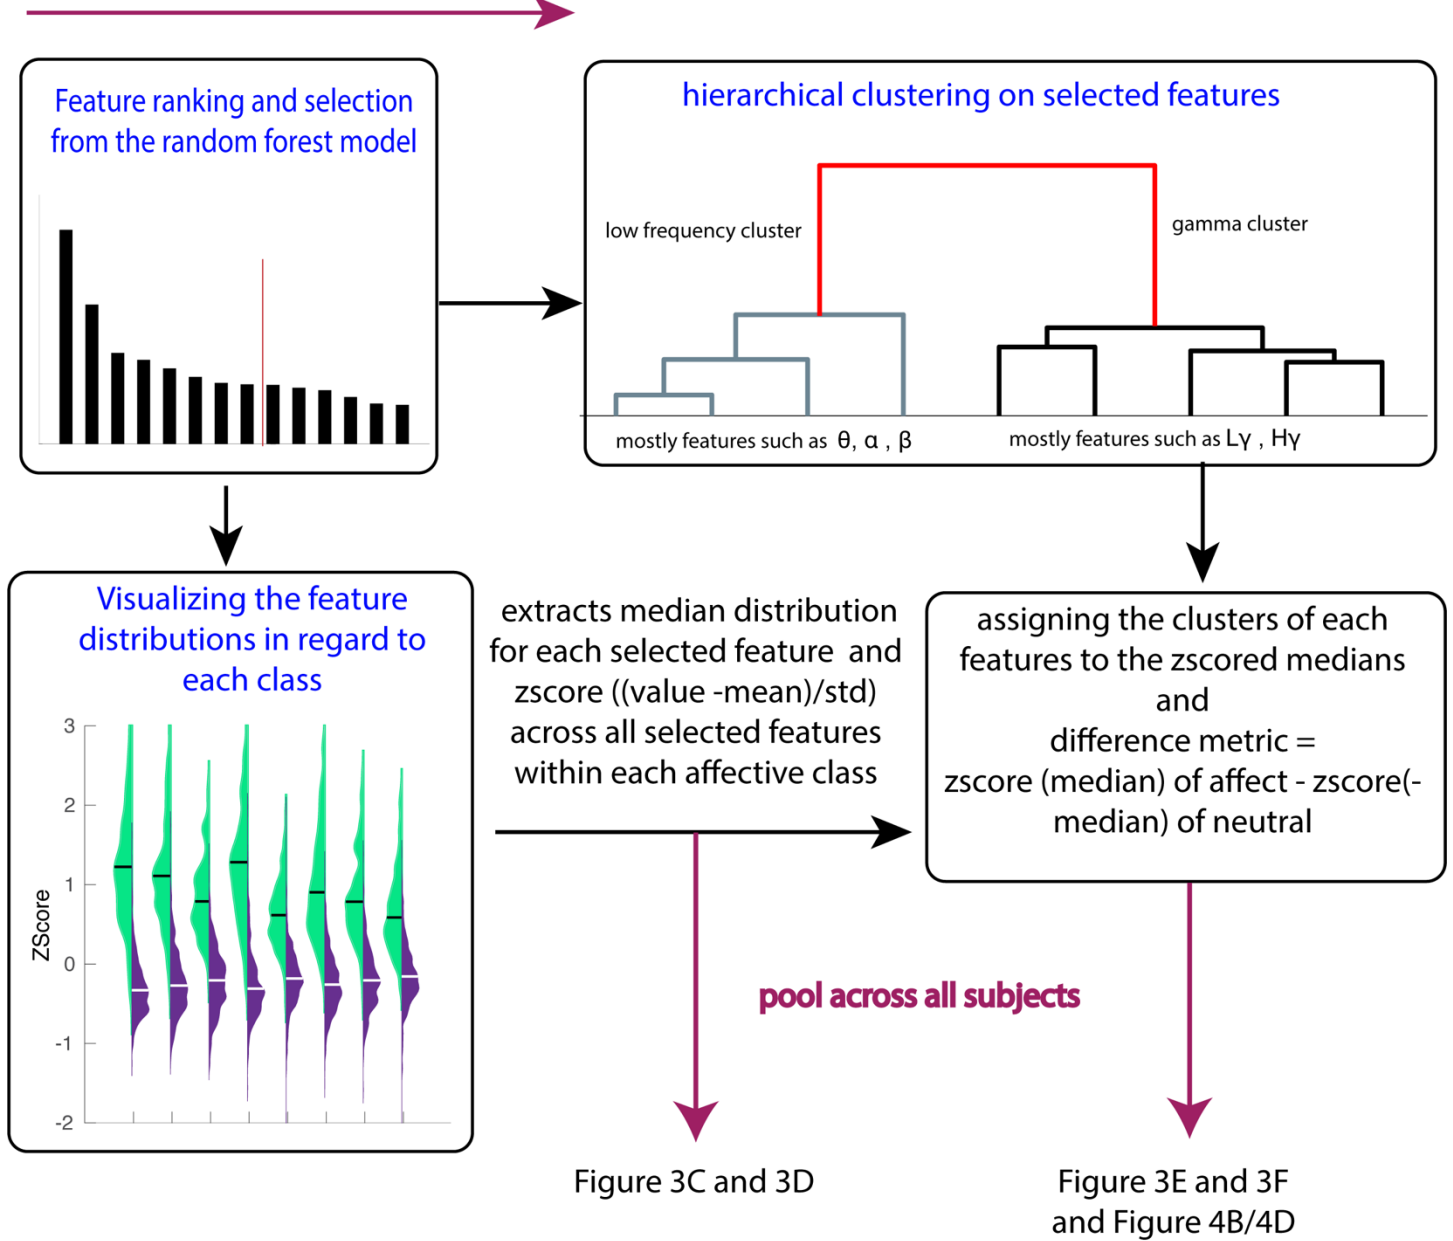

**Supplementary Figure 12.** *Confusion matrices from the multiclass decoders.* Percentages represent the number of labels of each class over the total number of labels within each fold and dataset, which are then averaged across all 100 runs of the RF models for each participant. Note the ideal separation = 33%. Color bars and percentages show the mean of the confusion matrix values across all 100 runs.

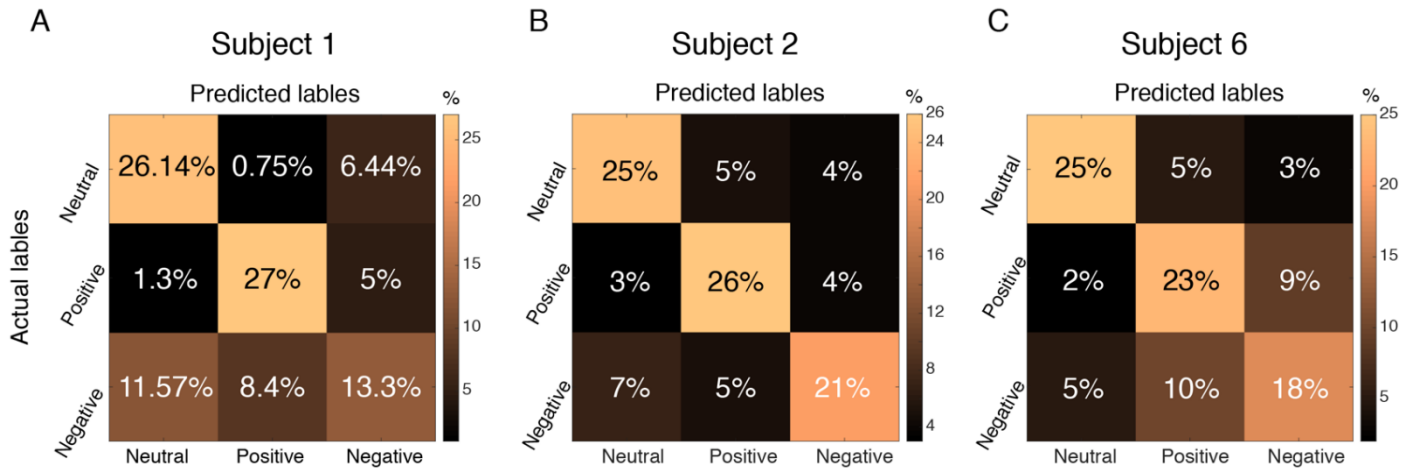

**Supplementary Figure 13.** Comparison of the decoding performance (ROC curves) for the three participants in whom the multiclass decoder was trained. The green lines represent results from positive vs. neutral decoders, the orange lines are negative vs. neutral decoders and the blue lines are the results from positive vs. negative models. Shadings represent standard error of mean across 100 runs of decoders.

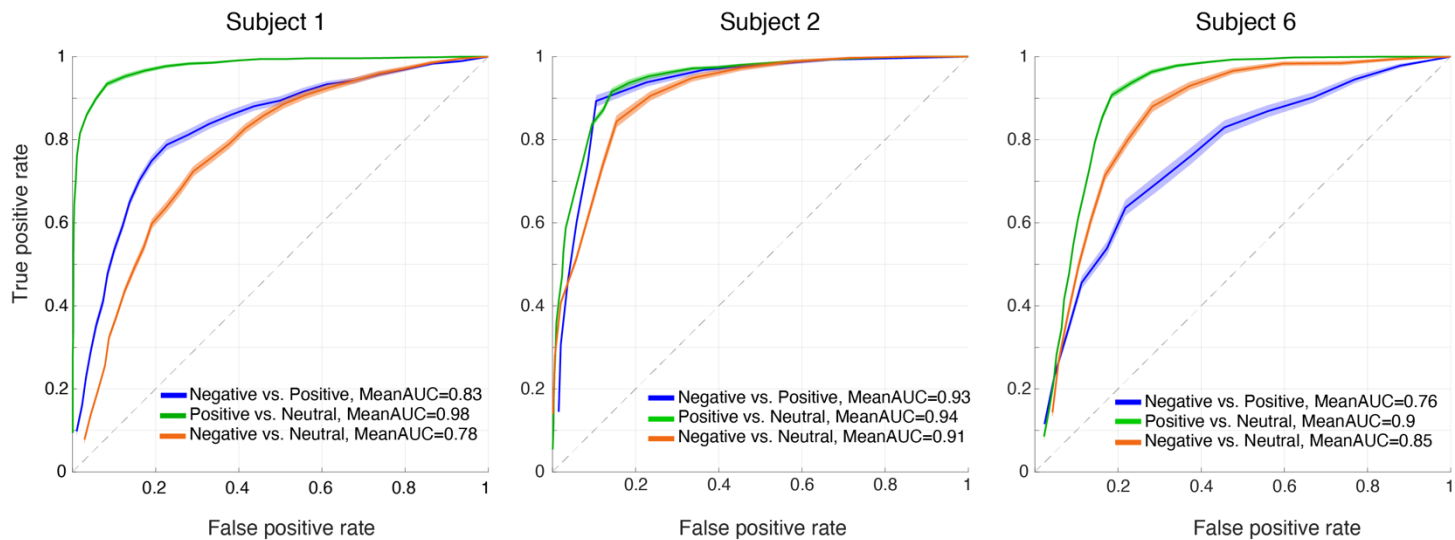



**Supplementary Figure 14.** Median values of the spectral features extracted from example electrodes during positive, negative, and neutral behaviors in three participants. Black rectangles highlight the selected features from the RF models.

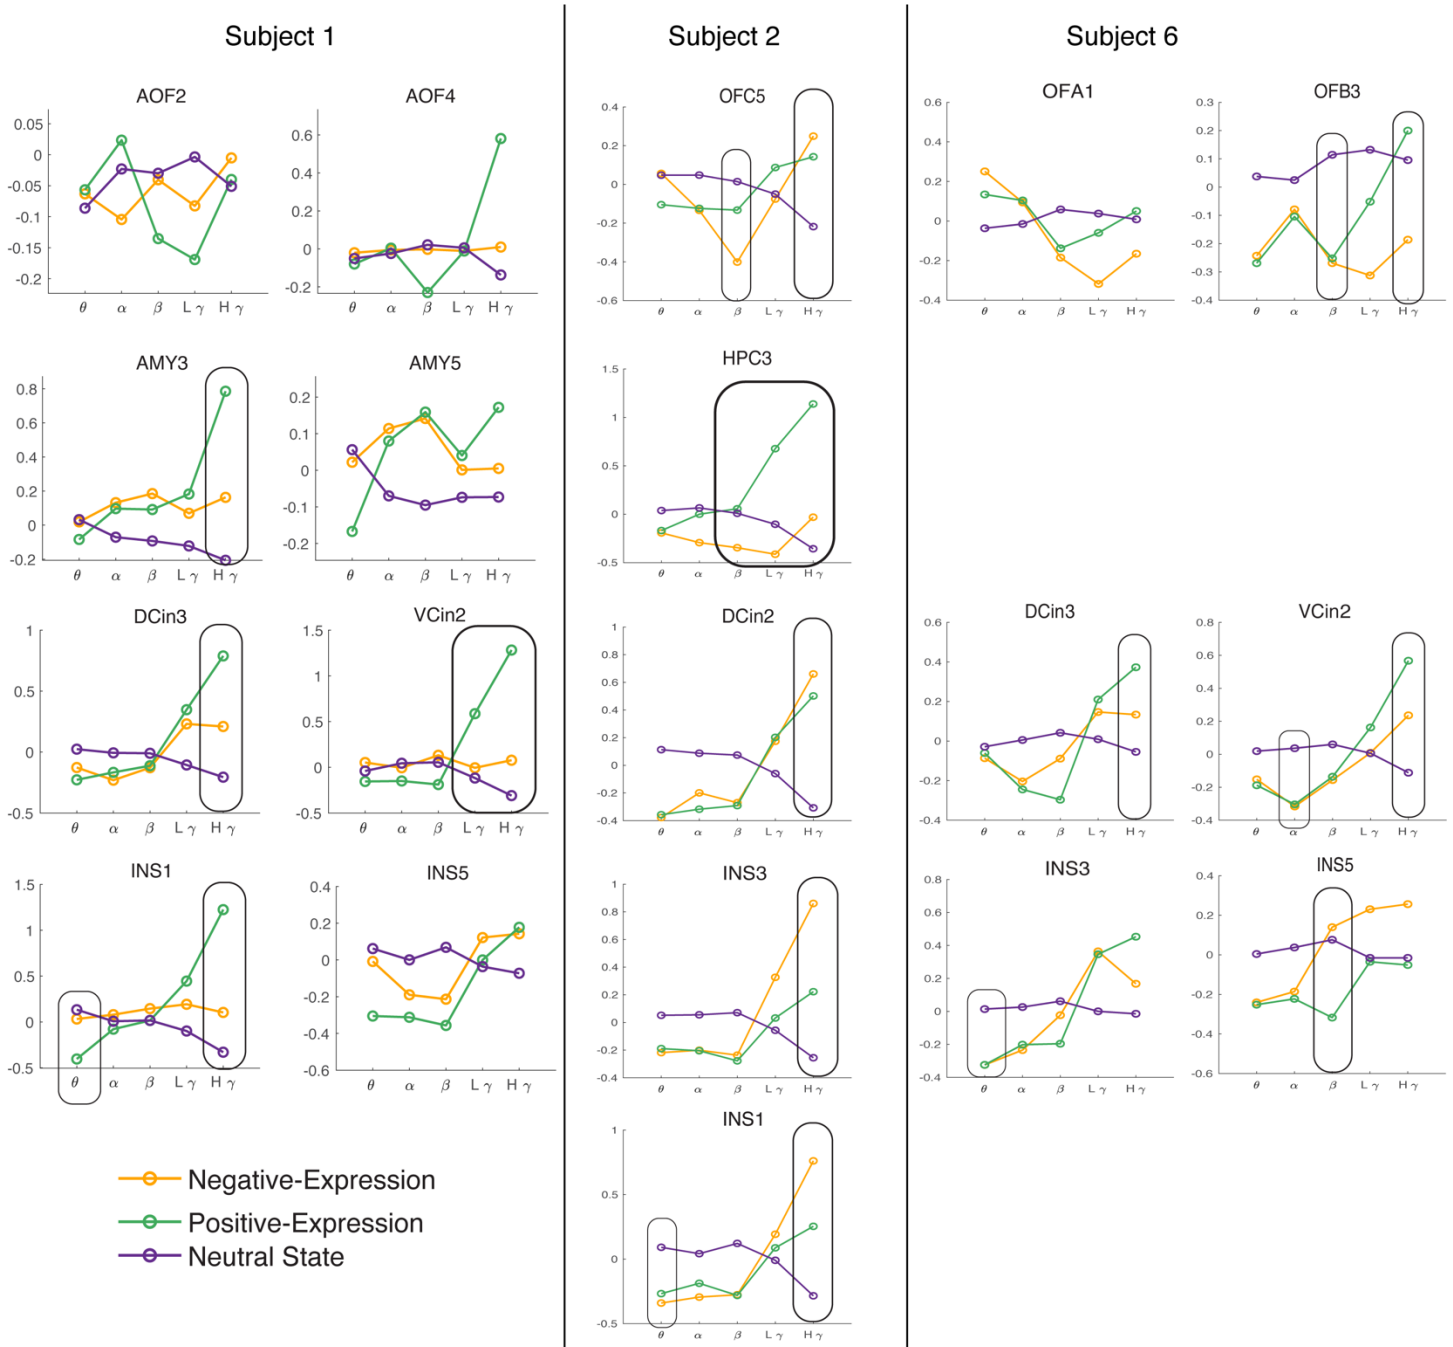

**Supplementary Figure 15.** Feature importance of the selected spectro-spatial features within the theta, alpha, beta, and high gamma bands pooled from the three participants in whom the multiclass decoders were trained. Low gamma was excluded because it did not reach statistical significance among the three behavioral classes.

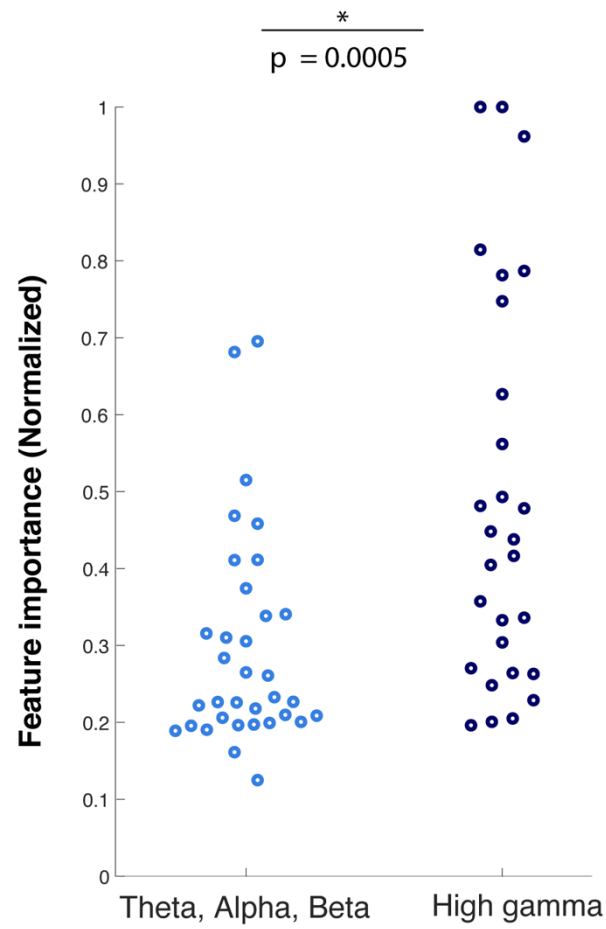

**Supplementary Table 1.** Demographic information, information about the seizure foci, sampled hemisphere, mesolimbic coverage, and available mesolimbic coverage after data cleaning from seizure activity.

| Subject Identifier | Age | Gender | Seizure foci                     | Hemisphere | Mesolimbic coverage             | Mesolimbic coverage after electrode cleaning (number of channels) |
|--------------------|-----|--------|----------------------------------|------------|---------------------------------|-------------------------------------------------------------------|
| Subject 1          | 35  | M      | Mesial temporal                  | Right      | INS, AMY, DCin, VCin, HPC, OFC, | OFC (4), AMY(3), DCin(2), VCin(2), INS(5)                         |
| Subject 2          | 21  | F      | hippocampus                      | Left       | INS, AMY, DCin, VCin, HPC, OFC  | OFC (3), HPC(1), DCin(2), INS(5)                                  |
| Subject 3          | 33  | F      | Posterior superior frontal gyrus | Right      | INS, AMY, DCin, VCin, HPC, OFC  | AMY(2), DCin(2), VCin(2), HPC(4), OFC(6)                          |
| Subject 4          | 20  | F      | Right parietal calcified lesion  | Bilateral  | INS, HPC, CIN, OFC              | RINS(3), RCin (2), ROFC(1), RHPC(2), LINS(3), LCin(1)             |
| Subject 5          | 20  | F      | Mesial temporal                  | Left       | INS, AMY, DCin, HPC, OFC        | OFC(18), AMY(4), HPC(1), INS(1), DCin(2)                          |
| Subject 6          | 34  | F      | Temporal lobe                    | Right      | INS, AMY, DCin, VCin, HPC, OFC  | INS(3), DCin(2), VCin(3), OFC(4)                                  |
| Subject 7          | 30  | M      | Mesial and lateral temporal lobe | Right      | INS, DCin, VCin, OFC            | INS(2), DCin(1), OFC(5)                                           |
| Subject 8          | 36  | M      | Mesial Temporal                  | Left       | INS, AMY, DCin, HPC, OFC        | INS(5), AMY(5), DCin(2), HPC(3)                                   |
| Subject 9          | 20  | M      | Hippocampus RNS (NA)             | Right      | INS, DCin, VCin, HPC, OFC       | INS(2), DCin(2), HPC(6), OFC(3)                                   |
| Subject 10         | 43  | M      | Left frontal                     | Left       | INS, AMY, HPC, OFC, VCin        | INS(1), AMY(2), HPC(1), OFC(4), VCin(2)                           |
| Subject 11         | 27  | F      | Anterior lateral temporal lobe   | Right      | AMY, HPC, ACin, PCin, OFC       | OFC(6), HPC(2), ACin(1)                                           |

**Supplementary Table 2.** Annotation instructions used by the human raters to code the affective behaviors

| Affective Behaviors    | Definition                                                                                                                                                                                                                                                   |
|------------------------|--------------------------------------------------------------------------------------------------------------------------------------------------------------------------------------------------------------------------------------------------------------|
| Smiling                | The patient is smiling when showing their teeth with a large grin                                                                                                                                                                                            |
| Laughing               | Patient is laughing, including chuckling.                                                                                                                                                                                                                    |
| Crying                 | Patient is crying                                                                                                                                                                                                                                            |
| Positive verbalization | Patient says something in the context of conversation that indicates a positive state. For example, "I love coffee! This made my day!"                                                                                                                       |
| Negative verbalization | Patient says something in the context of conversation that indicates a negative state. For example, "I'm having the worst day of my life"                                                                                                                    |
| Discomfort             | The patient verbally indicates (without being prompted by medical staff or family) that they are in pain. They could also be exhibiting physical symptoms such as holding their head for long periods of time, holding an icepack on their head, or moaning. |

**Supplementary Table 3.** Annotation instructions used by the human raters to code the neutral behaviors

| Other Behaviors            | Definition                                                                                                                                                                                                                                                                                                                                                                                                                                                    |
|----------------------------|---------------------------------------------------------------------------------------------------------------------------------------------------------------------------------------------------------------------------------------------------------------------------------------------------------------------------------------------------------------------------------------------------------------------------------------------------------------|
| MedON/MedOFF               | Medical staff present/absent                                                                                                                                                                                                                                                                                                                                                                                                                                  |
| FamON/FamOFF               | Family members or friends present/absent                                                                                                                                                                                                                                                                                                                                                                                                                      |
| ResearchON/<br>ResearchOFF | Research staff present/absent                                                                                                                                                                                                                                                                                                                                                                                                                                 |
| ConFam                     | The patient is engaged in a conversation, either talking or listening, (lasting more than 10 seconds) with family or friends                                                                                                                                                                                                                                                                                                                                  |
| ConMed                     | The patient is engaged in a conversation (lasting more than 10 seconds) with medical staff                                                                                                                                                                                                                                                                                                                                                                    |
| ConRes                     | The patient is engaged in a conversation (lasting more than 10 seconds) with research staff                                                                                                                                                                                                                                                                                                                                                                   |
| Comp                       | Patient is actively using a computer device including iPads<br>*this includes using computers/ipads during research testing                                                                                                                                                                                                                                                                                                                                   |
| Drink                      | The patient is drinking – start annotation when the patient is putting the cup to their mouth and drinking. Then annotation is off when the patient removes the cup from their mouth to stop drinking. Say for example that the patient is holding a cup in their hand and talking, this is not drinking. Drinking is ONLY when cup is going to mouth, physically drinking, and then the moment cup is pulled away from their mouth, turn the annotation off. |
| Eat                        | The patient is eating. Eating is turned on when the patient brings a fork to their mouth, chews, and when they stop chewing, then turn the annotation off.                                                                                                                                                                                                                                                                                                    |
| Headp                      | The patient is listening to something on their headphones. Turning Headp ON also applies to when a Patient is listening to music on their phone or a book on tape.                                                                                                                                                                                                                                                                                            |
| PersCare                   | Patient was personally caring for themselves which includes activities such as going to the restroom, brushing their hair, washing themselves etc.                                                                                                                                                                                                                                                                                                            |
| Phone                      | The patient is verbally talking into a phone or a patient is texting/surfing the web etc. on their phone.<br>*turn off phone when the patient is not actively engaged with it for 10 seconds or more.                                                                                                                                                                                                                                                         |
| Read                       | Patient is reading and must be actively engaged with it for 10 seconds or more.                                                                                                                                                                                                                                                                                                                                                                               |
| Search                     | The patient is actively searching for an item in or around their hospital bed                                                                                                                                                                                                                                                                                                                                                                                 |
| Seizure                    | The patient is having a seizure                                                                                                                                                                                                                                                                                                                                                                                                                               |
| Sleep/Eye closure          | The patient has their eyes closed and is not moving for more than 30 seconds. SleepON begins as soon as the patient closes their eyes.                                                                                                                                                                                                                                                                                                                        |
| TestMed                    | Medical staff are conducting medical tests on the patient such as taking blood pressure, changing IV, playing with any machine attached to the patient, etc.                                                                                                                                                                                                                                                                                                  |
| TResearch                  | Research Staff are administering research tasks to the patient                                                                                                                                                                                                                                                                                                                                                                                                |
| TV                         | TV is on in the patient's hospital room                                                                                                                                                                                                                                                                                                                                                                                                                       |

**Supplementary Table 4.** Number of instances of positive and negative affective behavior for each participant after neural data cleaning. NA = not used in decoding.

| Subject Identifier | Number of positive samples | Number of negative samples | Number of Affectless samples | Number of Rest samples | Percentage of affectless samples overlap with sleep | Percentage Of affect samples overlap with conversation | Hours | Number of channels (features) |
|--------------------|----------------------------|----------------------------|------------------------------|------------------------|-----------------------------------------------------|--------------------------------------------------------|-------|-------------------------------|
| Subject 1          | 164                        | 133                        | 499                          | 53                     | 26%                                                 | 45%                                                    | 14    | 17(85)                        |
| Subject 2          | 160                        | 28                         | 499                          | 439                    | 0%                                                  | 77%                                                    | 6     | 11 (55)                       |
| Subject 3          | 149                        | 5 (NA)                     | 499                          | 25                     | 46%                                                 | 94%                                                    | 11    | 16(80)                        |
| Subject 4          | 151                        | 12(NA)                     | 336                          | 44                     | 36%                                                 | 95%                                                    | 4     | 12(60)                        |
| Subject 5          | 161                        | 0(NA)                      | 277                          | 146                    | 0%                                                  | 79%                                                    | 4     | 26(130)                       |
| Subject 6          | 133                        | 65                         | 499                          | 499                    | 45%                                                 | 83%                                                    | 17    | 12(60)                        |
| Subject 7          | 51                         | 46                         | 499                          | 499                    | 11%                                                 | 62%                                                    | 17    | 8(40)                         |
| Subject 8          | 42                         | 15(NA)                     | 499                          | 103                    | 0%                                                  | 91%                                                    | 6     | 15(75)                        |
| Subject 9          | 55                         | 5(NA)                      | 499                          | 17(NA)                 | 9%                                                  | 63%                                                    | 8     | 13(65)                        |
| Subject 10         | 47                         | 3(NA)                      | 499                          | 274                    | 28%                                                 | 94%                                                    | 19    | 10(50)                        |
| Subject 11         | 4(NA)                      | 34                         | 499                          | 499                    | 19%                                                 | 44%                                                    | 10    | 9(45)                         |

**Supplementary Table 5.** Median distributions of the selected features across participants from the positive (n = 10) and negative (n = 5) decoders.

| Frequency band | Normalized median of spectro-spatial features from positive decoders<br>For the positive class | Normalized median of spectro-spatial features from positive decoders<br>For the neutral class | Normalized median of spectro-spatial features from negative decoders<br>For the negative class | Normalized median of spectro-spatial features from negative decoders<br>For the neutral class |
|----------------|------------------------------------------------------------------------------------------------|-----------------------------------------------------------------------------------------------|------------------------------------------------------------------------------------------------|-----------------------------------------------------------------------------------------------|
| High Gamma     | -0.37 (n = 86)                                                                                 | 0.8 (n=86)                                                                                    | 0.45 (n=33)                                                                                    | -0.94 (n=33)                                                                                  |
| Low Gamma      | 0.0012 (n= 65)                                                                                 | 0.44(n=65)                                                                                    | 0.79 (n=17)                                                                                    | 0.12 (n=17)                                                                                   |
| Beta           | 0.81 (n= 37)                                                                                   | -0.82 (n = 37)                                                                                | -0.46 (n = 23)                                                                                 | -0.81 (n = 23)                                                                                |
| Alpha          | -0.34 (n= 30)                                                                                  | -0.62 (n= 30)                                                                                 | -0.61 (n= 17)                                                                                  | 0.36 (n= 17)                                                                                  |
| Theta          | 0.32 (n= 55)                                                                                   | -0.85 (n=55)                                                                                  | -0.6 (n=17)                                                                                    | -0.07 (n=17)                                                                                  |

**Supplementary Table 6.** Multi-comparison tests compared the top selected features from the full models for the positive decoders (see also Extended Data Figure 6).

| Subject Identifier | Top 10 Features from Positive vs affectless decoders                                                                                                                               | Multi-comparison test among regions based on AUC                                                           |
|--------------------|------------------------------------------------------------------------------------------------------------------------------------------------------------------------------------|------------------------------------------------------------------------------------------------------------|
| Subject 1          | INS1 $H\gamma$ , VCin3 $H\gamma$ , DCin3 $H\gamma$ , VCin2 $H\gamma$ , AMY4 $H\gamma$ , AMY2 $H\gamma$ , AMY3 $H\gamma$ , INS2 $H\gamma$ , INS1- $\theta$ , INS3 $H\gamma$         | Ins, AMY, VCin                                                                                             |
| Subject 2          | HPC3 $H\gamma$ , DCin2 $H\gamma$ , INS1 $\theta$ , HPC3 $L\gamma$ , OFC2 $H\gamma$ , DCin2 $\theta$ , INS3 $\theta$ , INS3 $\beta$ , INS2 $H\gamma$ , INS5 $H\gamma$               | <b>HPC, Ins, DCin</b>                                                                                      |
| Subject 3          | HPC2 $\theta$ , HPC2 $L\gamma$ , AMY2 $\beta$ , HPC2 $H\gamma$ , AOFC2 $H\gamma$ , AOFC2 $L\gamma$ , HPC4 $\beta$ , HPC4 $H\gamma$ , AMY2 $\alpha$ , HPC1 $\beta$                  | <b>HPC, AMY, VCin, OFC</b>                                                                                 |
| Subject 4          | L_DCin2 $H\gamma$ , L-INS2 $\theta$ , L-INS3 $H\gamma$ , RH3 $\theta$ , L_DCin2 $L\gamma$ , RH3 $L\gamma$ , L-INS1 $H\gamma$ , RH4 $H\gamma$ , L-DCin2 $\alpha$ , L-INS3 $L\gamma$ | <b>L-Ins, L-DCin, R-HPC</b>                                                                                |
| Subject 5          | DCin3 $L\gamma$ , DCin4 $L\gamma$ , OFC8 $L\gamma$ , INS5- $\theta$ , HPC2- $H\gamma$ , DCin4 $\beta$ , OFC7 $L\gamma$ , OFC3 $L\gamma$ , AMY2 $\beta$ , OFC3 $H\gamma$            | <b>DCin, OFC, HPC, AMY</b>                                                                                 |
| Subject 6          | VCin3 $H\gamma$ , VCin2 $H\gamma$ , VCin4 $H\gamma$ , DCin3 $H\gamma$ , INS3 $H\gamma$ , INS3 $L\gamma$ , INS3 $\theta$ , INS5 $\beta$ , VCin3 $\beta$ , DCin2 $H\gamma$           | DCin, Ins<br>VCin, OFB                                                                                     |
| Subject 7          | AOFC2 $H\gamma$ , AOFC3 $H\gamma$ , INS1- $H\gamma$ , AOFC3 $L\gamma$ , INS1- $L\gamma$ , AOFC2 $L\gamma$ , POFC2 $H\gamma$ , AOFC1 $H\gamma$ , INS4- $H\gamma$ , DCin2- $H\gamma$ | No significance                                                                                            |
| Subject 8          | AMY4 $H\gamma$ , AMY4 $\theta$ , INS3 $H\gamma$ , INS5 $\beta$ , INS5 $H\gamma$ , AMY4 $\alpha$ , AMY4 $L\gamma$ , DCin3 $\theta$ , AMY3 $\alpha$ , INS1- $\alpha$                 | Ins, AMY                                                                                                   |
| Subject 9          | HPC5 $L\gamma$ , HPC6 $\alpha$ , HPC4 $\alpha$ , HPC2 $L\gamma$ , HPC3 $L\gamma$ , INS7 $H\gamma$ , INS6 $H\gamma$ , HPC4 $L\gamma$ , INS7 $L\gamma$ , HPC6 $L\gamma$              | HPC, Ins                                                                                                   |
| Subject 10         | OFC2 $L\gamma$ , OFC4 $L\gamma$ , OFC3 $L\gamma$ , OFC1 $L\gamma$ , OFC4 $H\gamma$ , OFC1 $H\gamma$ , OFC3 $H\gamma$ , HPC3 $\theta$ , OFC2 $H\gamma$ , INS1 $\theta$              | <b>OFC,</b><br>VCin, Ins, HD, AMY<br>(no other significance between all 4 regions, they all have high AUC) |



**Supplementary Table 7.** Multi-comparison tests compared the top selected features from the full models for the negative decoders (see also Extended Data Figure 7).

| Subject Identifier | Top 10 Features                                                                                                                                                                                    | Multi-comparison test among regions based on AUC |
|--------------------|----------------------------------------------------------------------------------------------------------------------------------------------------------------------------------------------------|--------------------------------------------------|
| Subject 1          | INS1 $H\gamma$ , DCin3 $H\gamma$ , DCin3 $L\gamma$ ,<br>INS4 $\alpha$ , VCin2 $H\gamma$ , AMY2 $H\gamma$ , AMY4 $H\gamma$ ,<br>AMY4 $\beta$ , INS5 $\beta$ ,<br>INS4 $L\gamma$                     | Ins, VCin,<br>DCin, Amy                          |
| Subject 2          | INS3 $H\gamma$ , DCin1 $\theta$ , INS4 $H\gamma$ , INS5 $H\gamma$ ,<br>OFC5 $\beta$ , INS1 $H\gamma$ , HPC3 $\beta$ , INS1 $\theta$ ,<br>INS1 $\alpha$ , INS1 $\beta$                              | HPC, Ins                                         |
| Subject 6          | VCin4 $H\gamma$ , INS5 $\theta$ , INS4 $L\gamma$ ,<br>OFB1 $L\gamma$ , OFB3 $L\gamma$ , OFA1 $L\gamma$ ,<br>INS3 $L\gamma$ , OFB3 $\beta$ , OFA3 $L\gamma$ , VCin2 $H\gamma$                       | Ins, DCin                                        |
| Subject 7          | AOFC1 $\theta$ , AOFC3 $\theta$ , INS4 $L\gamma$ ,<br>POFC2 $\beta$ , POFC4 $\beta$ , AOFC2 $L\gamma$ ,<br>POFC4 $\alpha$ , AOFC3 $\alpha$ , INS1 $\beta$ ,<br>AOFC2 $H\gamma$                     | POFC, Insula,<br>AOFC                            |
| Subject 11         | HPC2- $\theta$ , POFC1 $H\gamma$ ,<br>DCIN4 $\beta$ , DCIN4 $H\gamma$ ,<br>AOFC1 $\theta$ , AOFC1 $L\gamma$ , POFC2 $L\gamma$ , DCIN4 $\theta$ ,<br>HPC4 $\beta$ , HPC4 $H\gamma$ , DCIN4 $\alpha$ | <b>HPC</b> , DCin                                |

**Supplementary Table 8.** Multiclass decoder performance (F1-Score) related to figure 6-A.

| Subject                                | neutral class<br>F1-Score,<br>p-value from<br>shuffled models | Positive class<br>F1-Score,<br>p-value from<br>shuffled models | Negative class<br>F1-Score,<br>p-value from<br>shuffled models | Accuracy All                   |
|----------------------------------------|---------------------------------------------------------------|----------------------------------------------------------------|----------------------------------------------------------------|--------------------------------|
| S1                                     | 0.73 +- 0.01<br>Median = 0.73<br>$p=4 * 10^{-34}$             | 0.77+- 0.013<br>Median = 0.77<br>$p=4 * 10^{-31}$              | 0.44 +- 0.015<br>Median = 0.47<br>$p=8 * 10^{-12}$             | 0.66+- 0.006<br>Median = 0.66  |
| S2                                     | 0.73+- 0.016<br>Median = 0.75<br>$p=1.5 * 10^{-27}$           | 0.75 +- 0.017<br>Median = 0.75<br>$p=1.1 * 10^{-28}$           | 0.70+- 0.02<br>Median = 0.71<br>$p=2.5 * 10^{-19}$             | 0.72 +-0.0127<br>Median = 0.73 |
| S6                                     | 0.77 +-0.014<br>Median = 0.79<br>$p=7.65 * 10^{-30}$          | 0.65 +- 0.02<br>Median = 0.70<br>$p=1.6 * 10^{-19}$            | 0.59 +- 0.018<br>Median = 0.6<br>$p=7.3 * 10^{-17}$            | 0.67 +- 0.014<br>Median = 0.66 |
| Average<br>of all<br>three<br>subjects | 0.74 ± 0.013                                                  | 0.72 ± 0.037                                                   | 0.57 ± 0.07                                                    | 0.68 ± 0.016                   |

**Supplementary Table 9.** Multiclass decoder performance related to figure 6-C.

| Subject     | Accuracy     |
|-------------|--------------|
| Insula      | 0.62 ± 0.006 |
| OFC         | 0.52 ± 0.006 |
| Dorsal ACC  | 0.58 ± 0.008 |
| Ventral ACC | 0.58 ± 0.007 |

**Supplementary Table 10.** P-value regarding statistical test for panel F in figure 2. All values are obtained by two-sided non-parametric pairwise ranksum test across n=100 datasets.

| Subject Identifier | p-values          |
|--------------------|-------------------|
| Subject 1          | $1.8 * 10^{-34}$  |
| Subject 2          | $4.8 * 10^{-34}$  |
| Subject 3          | $5.5 * 10^{-32}$  |
| Subject 4          | $3.18 * 10^{-34}$ |
| Subject 5          | $6.41 * 10^{-34}$ |
| Subject 6          | $4.8 * 10^{-34}$  |
| Subject 7          | $3 * 10^{-13}$    |
| Subject 8          | $2 * 10^{-22}$    |
| Subject 9          | $8 * 10^{-27}$    |
| Subject 10         | $2.63 * 10^{-31}$ |

**Supplementary Table 11.** P-value regarding statistical test for panel G in figure 2. All values are obtained by two-sided non-parametric pairwise ranksum test across n=100 datasets

| Subject Identifier | p-values         |
|--------------------|------------------|
| Subject 1          | $1 * 10^{-23}$   |
| Subject 2          | $5 * 10^{-25}$   |
| Subject 6          | $2.4 * 10^{-26}$ |
| Subject 7          | $5.3 * 10^{-8}$  |
| Subject 11         | $2.5 * 10^{-21}$ |

## SI References

1. P. Krolak-Salmon, *et al.*, An attention modulated response to disgust in human ventral anterior insula: Disgust in Ventral Insula. *Ann. Neurol.* **53**, 446–453 (2003).
2. A. Touroutoglou, M. Hollenbeck, B. C. Dickerson, L. Feldman Barrett, Dissociable large-scale networks anchored in the right anterior insula subserve affective experience and attention. *NeuroImage* **60**, 1947–1958 (2012).
3. Y. Zhang, *et al.*, The Roles of Subdivisions of Human Insula in Emotion Perception and Auditory Processing. *Cereb. Cortex* **29**, 517–528 (2019).
